# Supplementary material for: Machine learning models for predicting childhood anemia in Mozambique: analysis from national survey data
Source: Research Square preprint supplement (doi:10.21203/rs.3.rs-7918744/v1), 2025-11-28
Supplement: Supplementary file 1 [file 73bae5b5fc13a061a774ddd2.docx]

**Supplementary material
Table S1. Performance Metrics of Prediction Models without Boruta**

| **Models** | **AUC-ROC** | **Precision** | **Specificity** | **Recall** | **F1** | **MCC** |
| --- | --- | --- | --- | --- | --- | --- |
| Xgboost | 0.722 | 0.787 | 0.922 | 0.429 | 0.556 | 0.416 |
| Catboost | 0.724 | 0.768 | 0.912 | 0.434 | 0.555 | 0.405 |
| Lightgbm | 0.714 | 0.705 | 0.854 | 0.520 | 0.599 | 0.401 |
| Random Forest | 0.715 | 0.802 | 0.925 | 0.449 | 0.576 | 0.440 |
| Logistic regression | 0.675 | 0.678 | 0.871 | 0.404 | 0.506 | 0.316 |
| **Best threshold (0.40)** | | | | | | |
| Xgboost |  | 0.639 |  | 0.591 | 0.614 | 0.377 |
| Catboost |  | 0.625 |  | 0.606 | 0.615 | 0.363 |
| LightGBM* |  | 0.587 |  | 0.626 | 0.606 | 0.327 |
| Random Forest |  | 0.611 |  | 0.611 | 0.611 | 0.349 |
| Logistic regression |  | 0.458 |  | 0.823 | 0.588 | 0.183 |


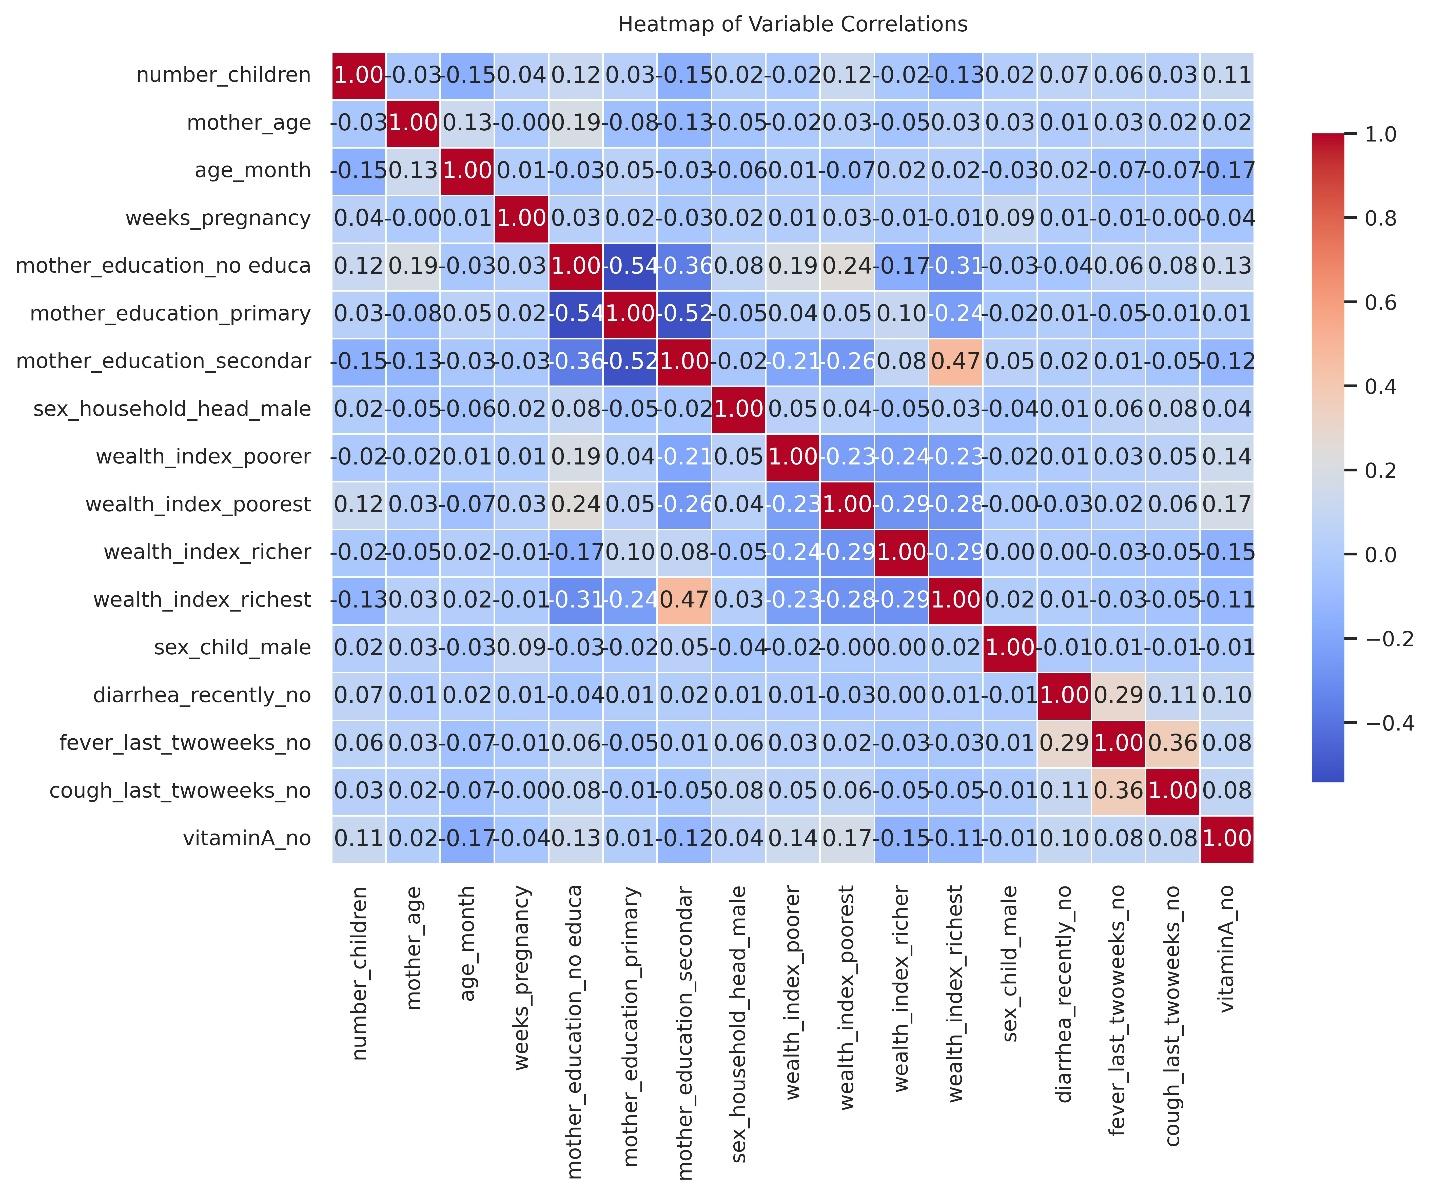


**Figure S1. Correlation of variables after the creation of dummies and standardization**


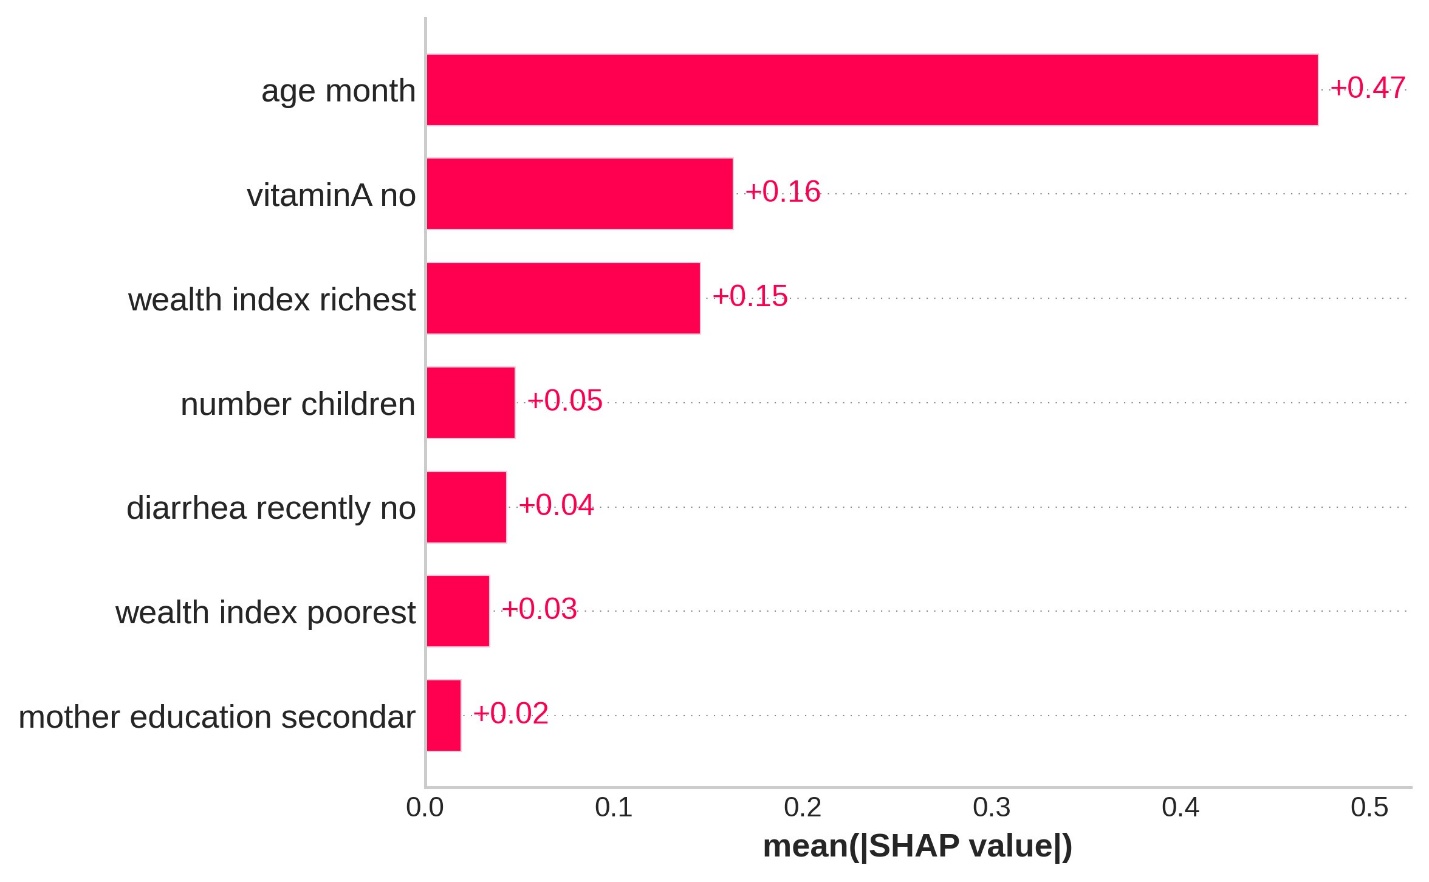


**Figure S2**. **Average** f**eature importance in predicting anemia in children under 5 years old (SHAP values)**


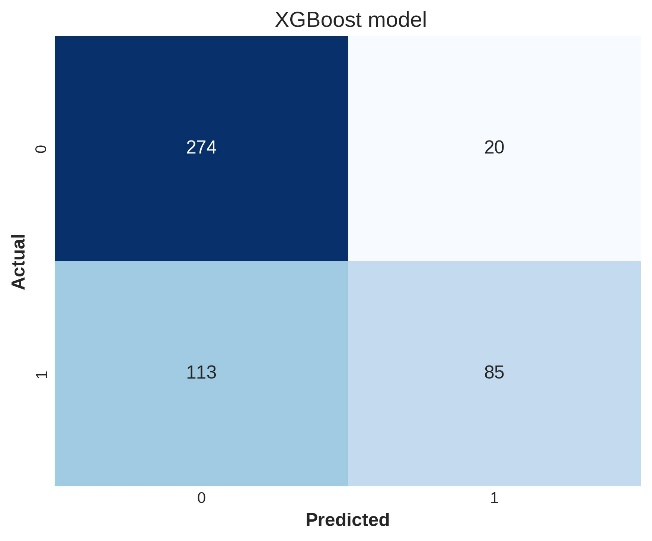


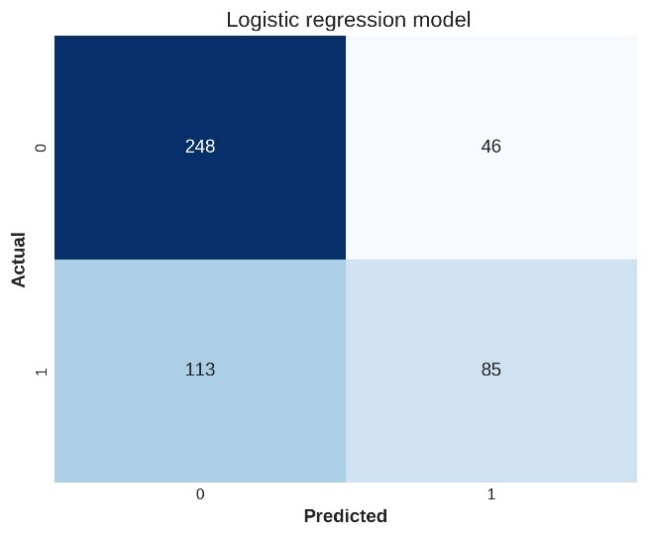


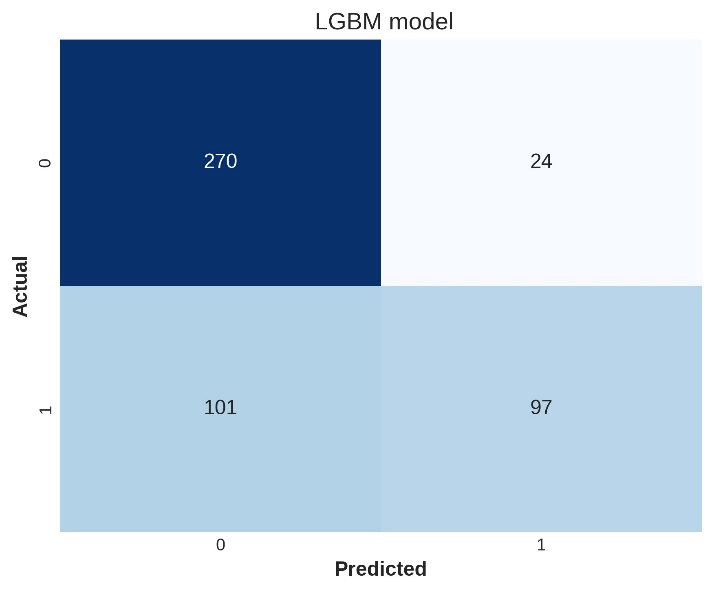

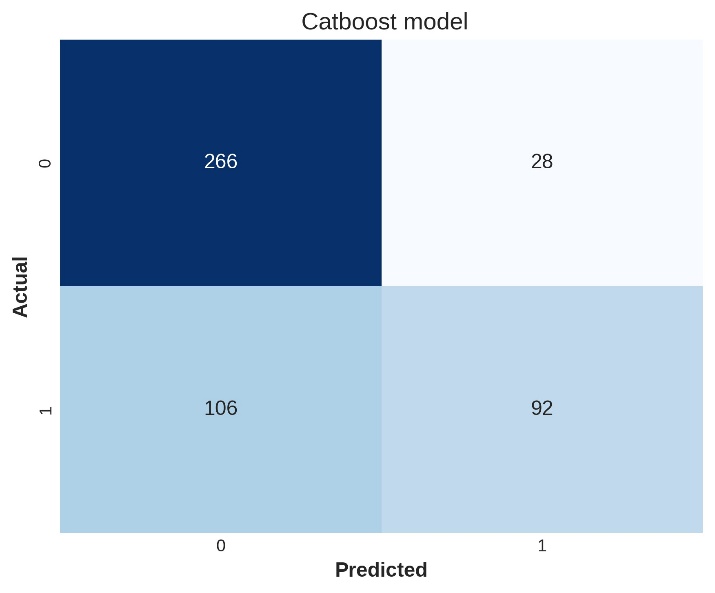


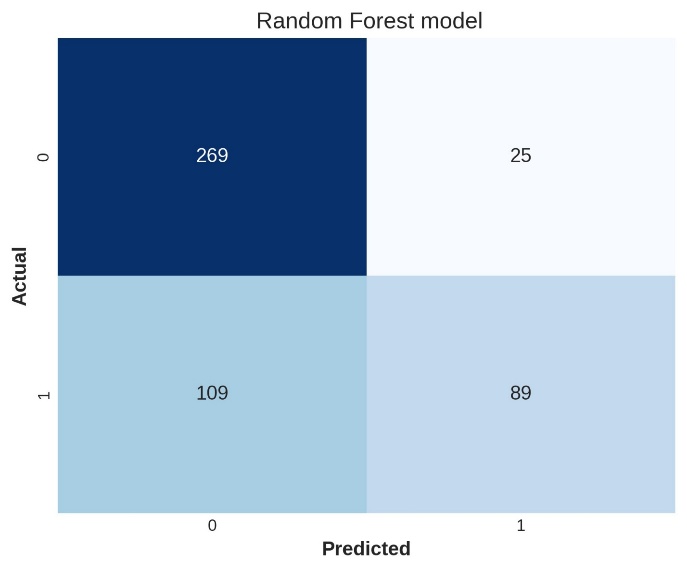


**Figure S3. Confusion Matrix for predicting anemia in children under 5 years old**


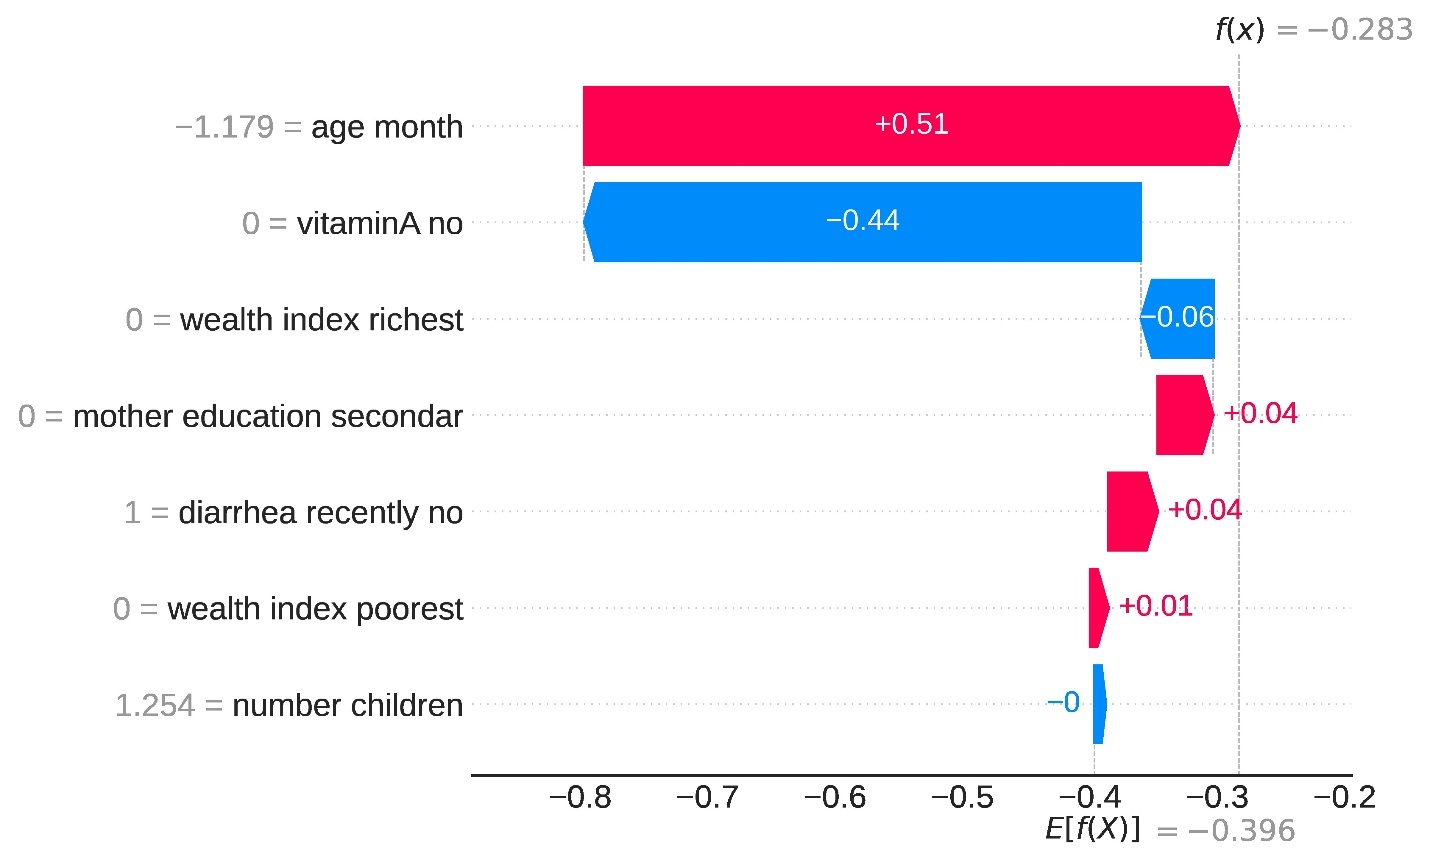
 **Figure S4.** **SHAP waterfall plot for variable contributions to the individual prediction of anemia**
